# Supplementary material
Source: PubMed Central journal article supplement (PMC2533267)
Supplement: NIHMS62055-supplement-si20061212_085.pdf [file NIHMS62055-supplement-si20061212_085.pdf]

# Accelerating the Discovery of Biologically Active Small Molecules

## Using a High-Throughput Yeast Halo Assay<sup>#</sup>

Nadine C. Gassner,<sup>†</sup> Craig M. Tamble,<sup>†</sup> Jonathan E. Bock,<sup>†</sup> Naomi Cotton,<sup>†</sup> Kimberly N. White,<sup>†</sup> Karen Tenney,<sup>†</sup> Robert P. St. Onge,<sup>‡</sup> Michael J. Proctor,<sup>§</sup> Guri Giaever,<sup>⊥</sup> Ronald W. Davis,<sup>§,||</sup> Phillip Crews,<sup>†,\*</sup> Theodore R. Holman,<sup>†,\*</sup> and R. Scott Lokey<sup>†,\*</sup>

---

<sup>#</sup> Dedicated to the late Dr. Kenneth L. Rinehart of the University of Illinois at Urbana-Champaign for his pioneering work on bioactive natural products.

<sup>\*</sup> To whom correspondence should be addressed. P.C., Tel: 831-459-2603, Fax: 831-459-4197, phil@chemistry.ucsc.edu; T.R.H., Tel: 831-459-5884, Fax: 831-459-2935, tholman@chemistry.ucsc.edu; R.S.L., Tel: 831-459-1307, Fax: 831-459-2935, lokey@chemistry.ucsc.edu.

<sup>†</sup> University of California, Santa Cruz, California 95064.

<sup>‡</sup> Department of Genetics, Stanford University School of Medicine.

<sup>§</sup> Stanford Genome Technology Center.

<sup>⊥</sup> Faculty of Pharmacy, Donnelly Centre for Cellular and Biomolecular Research, University of Toronto, 168 College Street, Toronto.

Department of Biochemistry, Stanford University School of Medicine.

## Supporting Information

### Index:

**Figure S1:** Above Water (A) and Below Water (B) Images of *Monanchora unguifera*, UCSC Collection Number 03500.

**Figure S2:** Isolation Scheme for Crambescidin 800.

**Figure S3:**  $^1\text{H}$  NMR Spectrum of Crambescidin 800.

**Figure S4:**  $^{13}\text{C}$  NMR Spectrum of Crambescidin 800.

**Table S1:** Comparison of  $^{13}\text{C}$  NMR Signals for Several Known Polycyclic Guanidinium Alkaloids.

**Table S2:** Stereochemical Diversity Found in Naturally Derived Polycyclic Guanidinium Alkaloids.

**Figure S1:** Above Water (A) and Below Water (B) Images of *Monanchora unguifera*, UCSC Collection Number 03500.

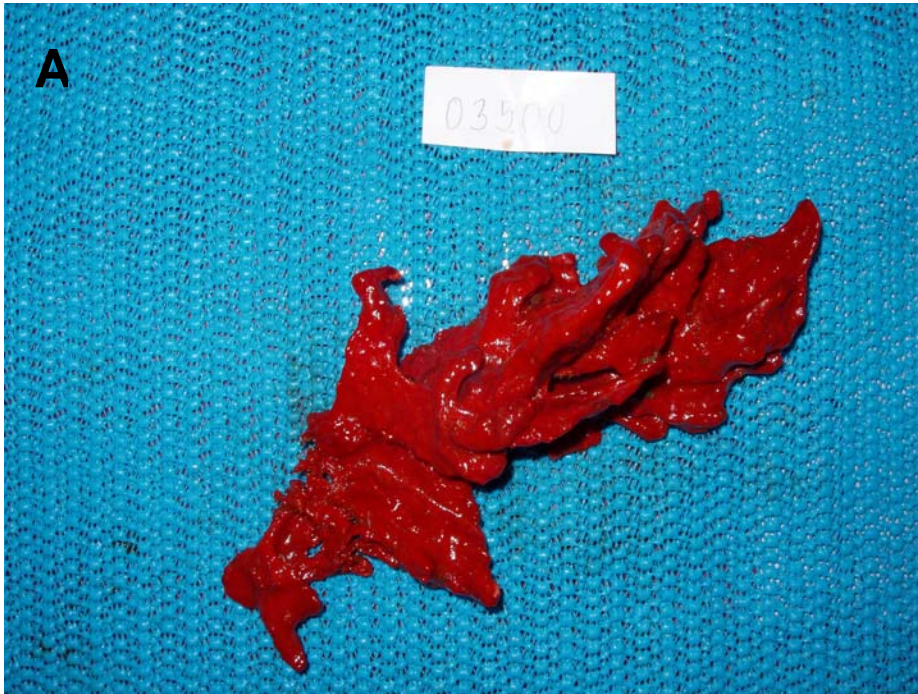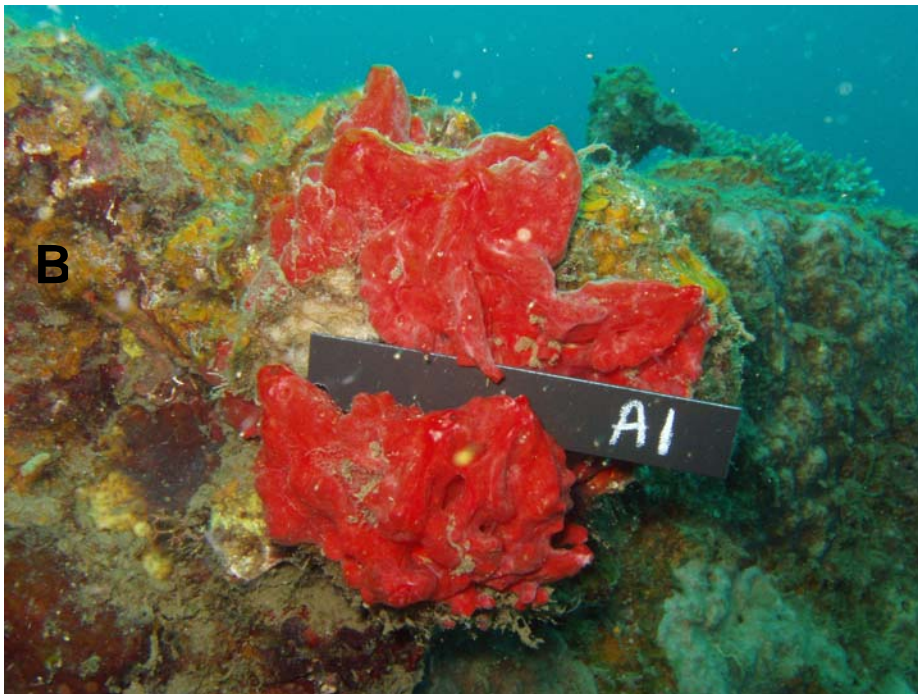

**Figure S2:** Isolation Scheme for Crambescidin 800.

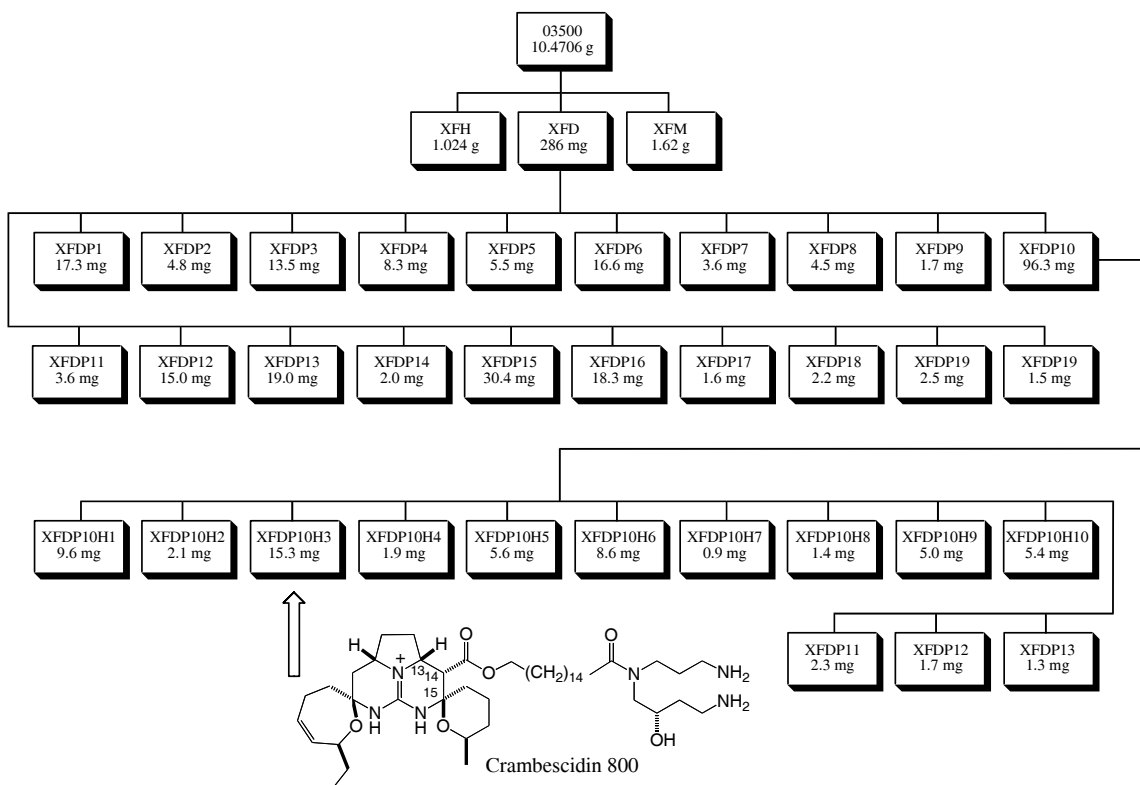

**Figure S3:**  $^1\text{H}$  NMR Spectrum of Crambescidin 800.

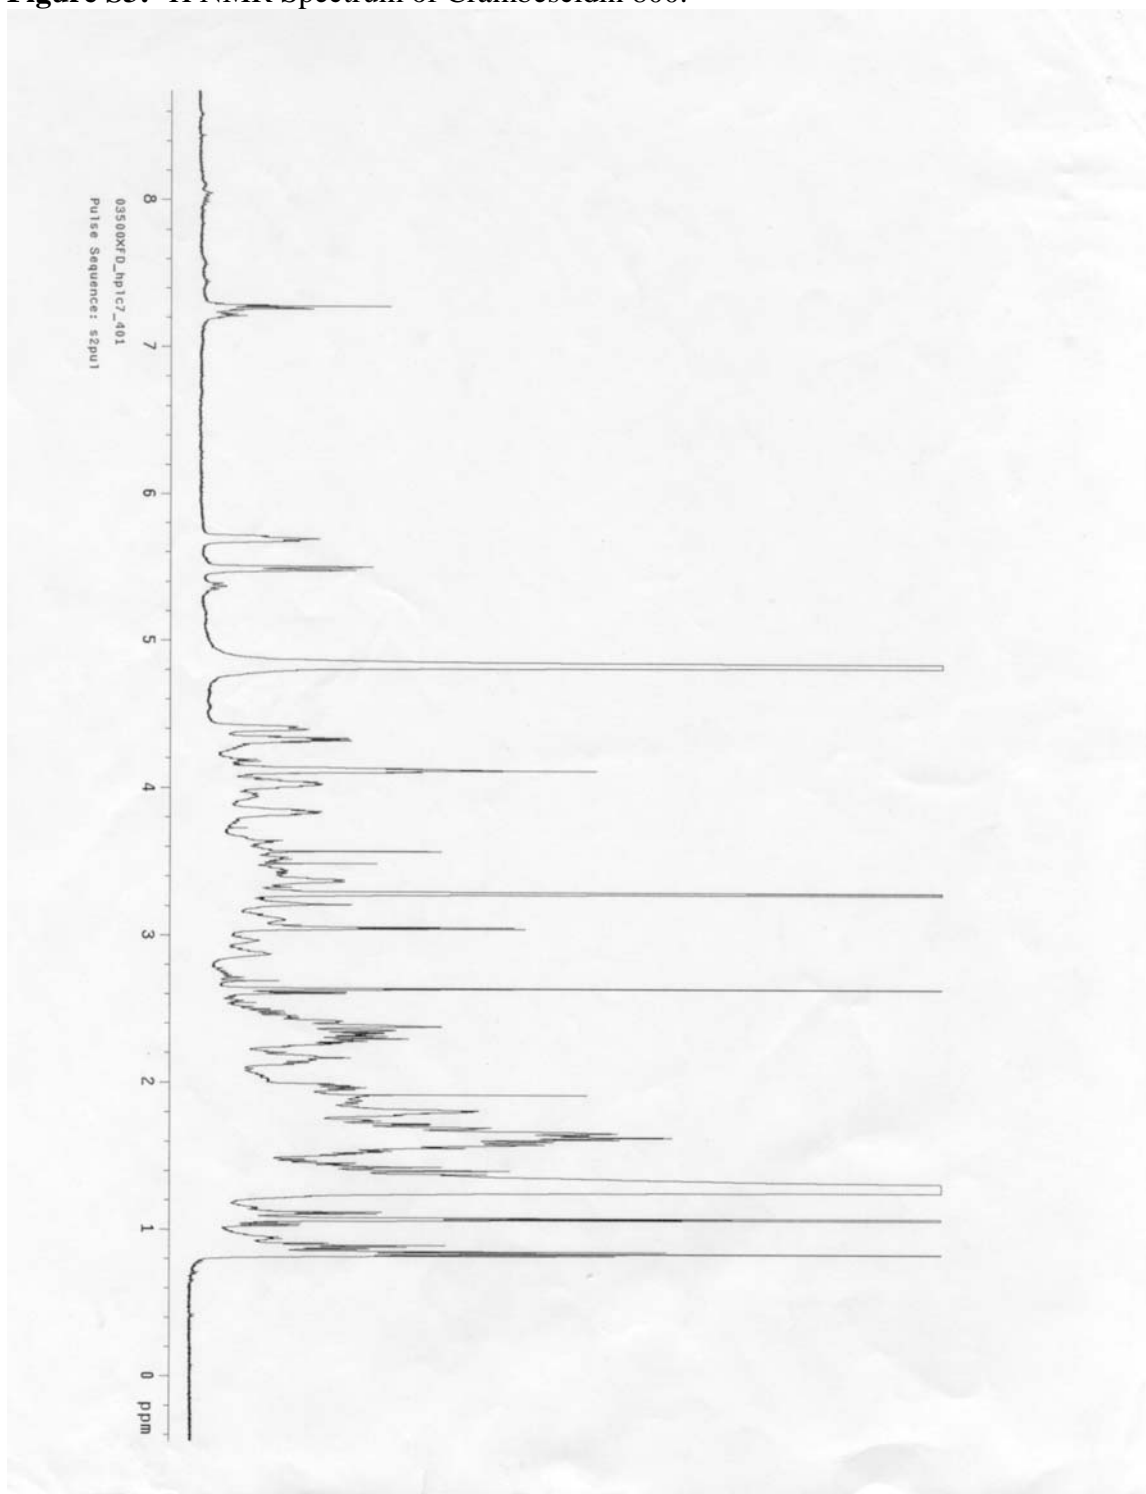

**Figure S4:**  $^{13}\text{C}$  NMR Spectrum of Crambescidin 800.

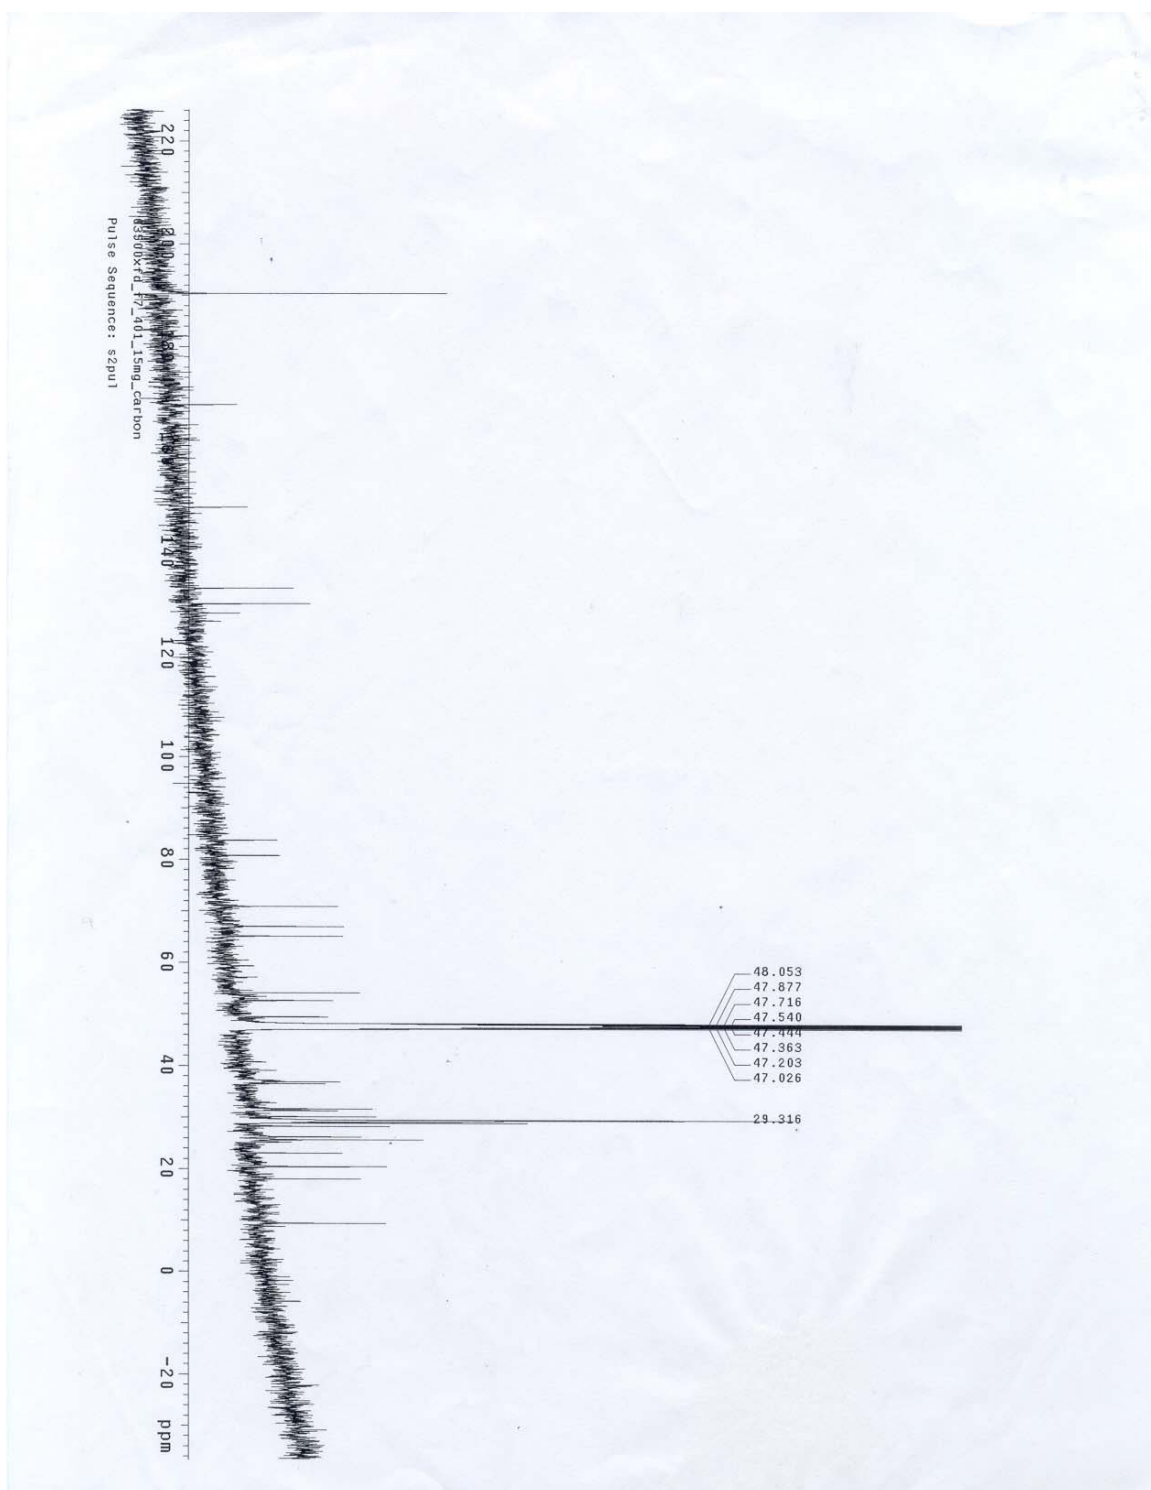

**Table S1.** Comparison of  $^{13}\text{C}$  NMR Signals for Several Known Polycyclic Guanidinium Alkaloids.

|      | crambescidin 800<br>$\text{CD}_3\text{OD}$ | acetylcrambescidin 800<br>$\text{CDCl}_3$ | ptilomycalin A<br>$\text{CDCl}_3$ | 13,14,15-isocrambescidin 800<br>$\text{CD}_3\text{OD}$ | experimental<br>$\text{CD}_3\text{OD}$ |
|------|--------------------------------------------|-------------------------------------------|-----------------------------------|--------------------------------------------------------|----------------------------------------|
| C-1  | 9.4                                        | 10.1                                      | 10.2                              | 10.7                                                   | 10.9                                   |
| C-2  | 26.2                                       | 29.8                                      | 29.2                              | 30.2                                                   | 29.8                                   |
| C-3  | 72.2                                       | 71.0                                      | 70.9                              | 71.9                                                   | 71.9                                   |
| C-4  | 133.0                                      | 133.6                                     | 133.7                             | 134.0                                                  | 134                                    |
| C-5  | 129.3                                      | 129.8                                     | 130                               | 131.2                                                  | 131.5                                  |
| C-6  | 23.0                                       | 23.5                                      | 23.7                              | 24.9                                                   | 24.5                                   |
| C-7  | 36.5                                       | 37.0                                      | 36.2                              | 39.0                                                   | -                                      |
| C-8  | 83.6                                       | 83.7                                      | 86.9                              | 86.6                                                   | 85.0                                   |
| C-9  | 37.1                                       | 36.9                                      | 36.9                              | 38.0                                                   | -                                      |
| C-10 | 54.1                                       | 53.9                                      | 54.1                              | 54.6                                                   | 55.7                                   |
| C-11 | 30.2                                       | 30.6                                      | 30.7                              | 30.8                                                   | 30.3                                   |
| C-12 | 28.2                                       | 27                                        | 26.8                              | 29.6                                                   | 27.7                                   |
| C-13 | 52.5                                       | 51.9                                      | 52.1                              | 54.2                                                   | 50.9                                   |
| C-14 | 49.4                                       | 48.9                                      | 50.1                              | 42.5                                                   | 49.6                                   |
| C-15 | 80.6                                       | 80.7                                      | 80.8                              | 84.4                                                   | 81.9                                   |
| C-16 | 32.8                                       | -                                         | 31.7                              | 33.6                                                   | 31.6                                   |
| C-17 | 18.1                                       | -                                         | 18.0                              | 20.9                                                   | 19.5                                   |
| C-18 | 32.1                                       | -                                         | 32.1                              | 32.9                                                   | 32.5                                   |
| C-19 | 70.9                                       | 67.2                                      | 67.1                              | 70.0                                                   | -                                      |
| C-20 | 20.4                                       | 21.4                                      | 21.6                              | 22.3                                                   | 21.9                                   |
| C-21 | 151.3                                      | 148.8                                     | 149.1                             | 150.1                                                  | 149.9                                  |
| C-22 | 168.6                                      | 168.8                                     | 168.6                             | 167.7                                                  | 169.8                                  |
| C-23 | 65.1                                       | 65.5                                      | 65.5                              | 66.1                                                   | 66.6                                   |
| C-24 | 29.3                                       | -                                         | 28.5                              | 28.4                                                   | -                                      |
| C-36 | 25.6                                       | -                                         | 25.7                              | 26.5                                                   | 26.6                                   |
| C-37 | 32.8                                       | -                                         | 33.2                              | 34.1                                                   | -                                      |
| C-38 | 176                                        | 174.5                                     | 174.9                             | 177.3                                                  | 176.8                                  |
| C-39 | 42.5                                       | 42.6                                      | 42.1                              | 42.8                                                   | -                                      |
| C-40 | 25.3                                       | 26.5                                      | 27.0                              | 26.5                                                   | 26.8                                   |
| C-41 | 36.5                                       | 36.5                                      | 36.1                              | 38.2                                                   | -                                      |
| C-42 | 53.4                                       | 50.5                                      | 47.6                              | 54.7                                                   | 54.2                                   |
| C-43 | 67.0                                       | 70.8                                      | 26.1                              | 68.4                                                   | 68.7                                   |
| C-44 | 32.3                                       | 32.0                                      | 26.4                              | 32.8                                                   | -                                      |
| C-45 | 37.1                                       | 36.0                                      | 39.3                              | 38.4                                                   | -                                      |

**Table S2.** Stereochemical Diversity Found in Naturally Derived Polycyclic Guanidinium Alkaloids.

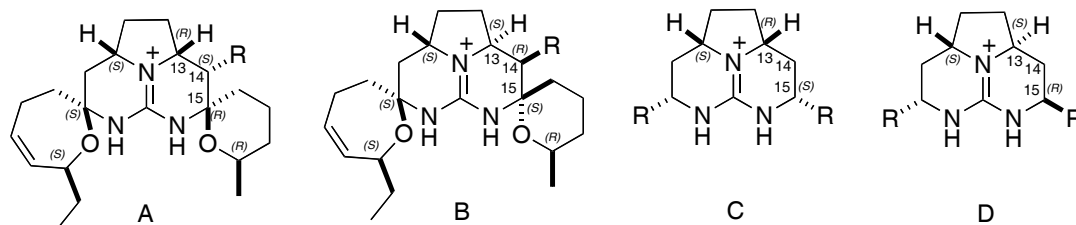

| compound                                         | type A | type B | type C | type D | origin                                                                                                                         |
|--------------------------------------------------|--------|--------|--------|--------|--------------------------------------------------------------------------------------------------------------------------------|
| ptilomycalin A <sup>1</sup>                      | X      |        |        |        | <i>Crambe crambe</i>                                                                                                           |
| crambescidin 844 <sup>2</sup>                    | X      |        |        |        | <i>Crambe crambe</i>                                                                                                           |
| crambescidin 830 <sup>2</sup>                    | X      |        |        |        | <i>Crambe crambe</i>                                                                                                           |
| crambescidin 826 <sup>3</sup>                    | X      |        |        |        | <i>Monanchora</i> sp.                                                                                                          |
| crambescidin 816 <sup>2</sup>                    | X      |        |        |        | <i>Crambe crambe</i>                                                                                                           |
| crambescidin 800 <sup>2</sup>                    | X      |        |        |        | <i>Ptilocaulis spiculifer</i> , <i>Hemimycala</i> sp., <i>Batzella</i> sp., <i>Celerina heffernani</i> , <i>Fromia monilis</i> |
| 13,14,15-isocrambescidin 800 <sup>4</sup>        |        | X      |        |        | <i>Crambe crambe</i>                                                                                                           |
| crambescidin 431 <sup>5</sup>                    | X      |        |        |        | <i>Monanchora unguifera</i>                                                                                                    |
| crambescidin 359 <sup>5</sup>                    | X      |        |        |        | <i>Monanchora unguifera</i>                                                                                                    |
| crambescidic acid/ crambescidin 657 <sup>6</sup> | X      |        |        |        | <i>Monanchora unguifera</i>                                                                                                    |
| 13,14,15-isocrambescidin 657 <sup>7</sup>        |        | X      |        |        | <i>Crambe crambe</i>                                                                                                           |
| neofolitispace 1 <sup>8</sup>                    | X      |        |        |        | <i>Neofolitispa dianchora</i>                                                                                                  |
| neofolitispace 2 <sup>8</sup>                    | X      |        |        |        | <i>Neofolitispa dianchora</i>                                                                                                  |
| neofolitispace 3 <sup>8</sup>                    | X      |        |        |        | <i>Neofolitispa dianchora</i>                                                                                                  |
| celeromycalin <sup>9</sup>                       | X      |        |        |        | <i>Celerina heffernani</i>                                                                                                     |
| batzelladine A <sup>10</sup>                     |        |        |        | X      | <i>Batzella</i> sp.                                                                                                            |
| batzelladine B <sup>10</sup>                     |        |        | X      |        | <i>Batzella</i> sp.                                                                                                            |
| batzelladine D <sup>10</sup>                     |        |        |        | X      | <i>Batzella</i> sp.                                                                                                            |
| batzelladine E <sup>10</sup>                     |        |        | X      |        | <i>Batzella</i> sp.                                                                                                            |
| batzelladine F <sup>11</sup>                     |        |        |        | X      | <i>Batzella</i> sp.                                                                                                            |
| batzelladine G <sup>10</sup>                     |        |        |        | X      | <i>Batzella</i> sp.                                                                                                            |
| fromiamycalin <sup>9</sup>                       | X      |        |        |        | <i>Fromia monilis</i>                                                                                                          |

<sup>1</sup> Kashman, Y.; Hirsh, S.; McConnell, O. J.; Ohtani, I.; Kusumi, T.; Kakisawa, H. *J. Am. Chem. Soc.* **1989**, *111*, 8925-8926.

<sup>2</sup> Jares-Erijman, E. A.; Sakai, R.; Rinehart, K. L. *J. Org. Chem.* **1991**, *56*, 5712-5715.

<sup>3</sup> Chang, L. C.; Whittaker, N. F.; Bewley, C. A. *J. Nat. Prod.* **2003**, *66*, 1490-1494.

<sup>4</sup> Jares-Erijman, E. A.; Ingram, A. L.; Carney, J. R.; Rinehart, K. L.; Sakai, R. *J. Org. Chem.* **1993**, *58*, 4805-4808.

<sup>5</sup> Braekman, J. C.; Daloz, D.; Tavares, R.; Hajdu, E.; Van Soest, R. W. M. *J. Nat. Prod.* **2000**, *63*, 193-196.

<sup>6</sup> Gallimore, W. A.; Kelly, M.; Scheuer, P. J. *J. Nat. Prod.* **2005**, *68*, 1420-1423.

<sup>7</sup> Shi, J.-G.; Sun, F.; Rinehart, K. L. WO Patent 3,756,734, 1998.

<sup>8</sup> Lewis, J. R. *Nat. Prod. Rep.* **1994**, *11*, 395-418.

<sup>9</sup> Palagiano, E.; Demarino, S.; Minale, L.; Riccio, R.; Zollo, F.; Iorizzi, M.; Carre, J. B.; Debitus, C.; Lucarain, L.; Provost, J. *Tetrahedron* **1995**, *51*, 3675-3682.

<sup>10</sup> Patil, A. D.; Kumar, N. V.; Kokke, W. C.; Bean, M. F.; Freyer, A. J.; Debrosse, C.; Mai, S.; Truneh, A.; Faulkner, D. J.; Carte, B.; Breen, A. L.; Hertzberg, R. P.; Johnson, R. K.; Westley, J. W.; Potts, B. C. M. *J. Org. Chem.* **1995**, *60*, 1182-1188.

<sup>11</sup> Patil, A. D.; Freyer, A. J.; Taylor, P. B.; Carte, B.; Zuber, G.; Johnson, R. K.; Faulkner, D. J. *J. Org. Chem.* **1997**, *62*, 1814-1819.
